# Supplementary material for: Organic Farm Bedded Pack System Microbiomes: A Case Study with Comparisons to Similar and Different Bedded Packs
Source: MDPI journal article supplement (doi:10.3390/dairy3030042), 2022-08-19
Supplement: s1 [file s1]

## Supplementary Material File S2

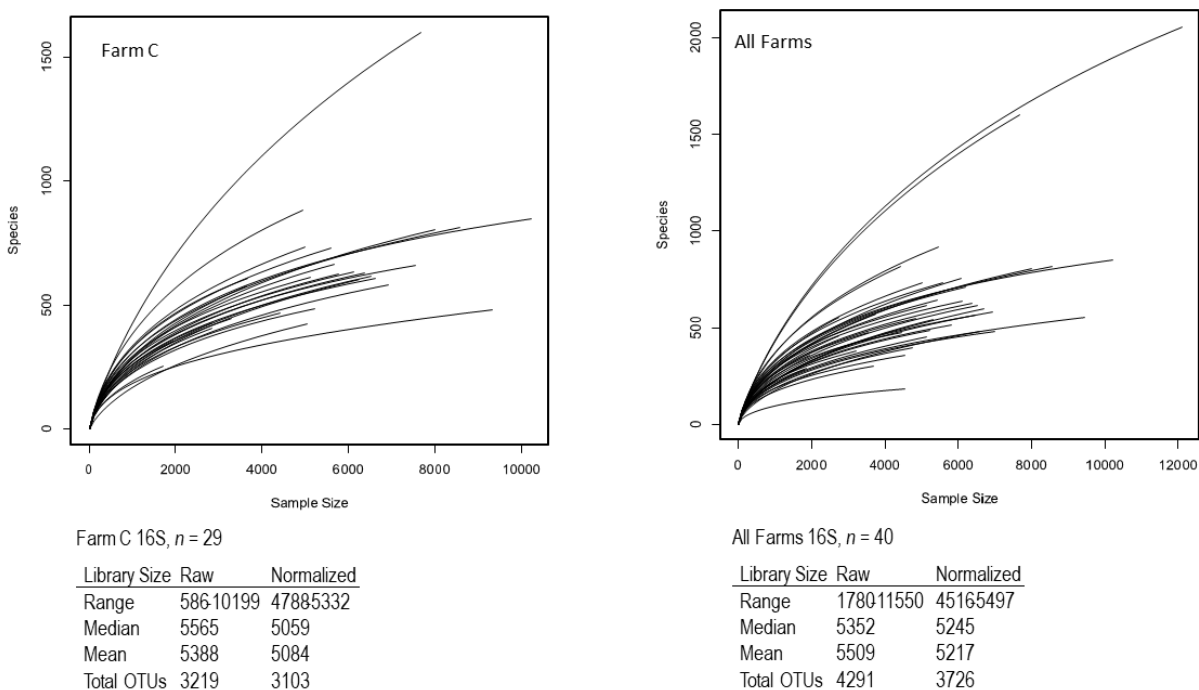

**Figure S1 Normalization curves for bacterial amplicons** produced by 515F and 806 primers targeted for the V4 region of 16S rRNA genes. Independent normalization curves were established for reference Farm C (left) and for all farms combined (right). Each sample was randomly subset stepwise without replacement to represent the relationship between sequencing depth and OTU richness.

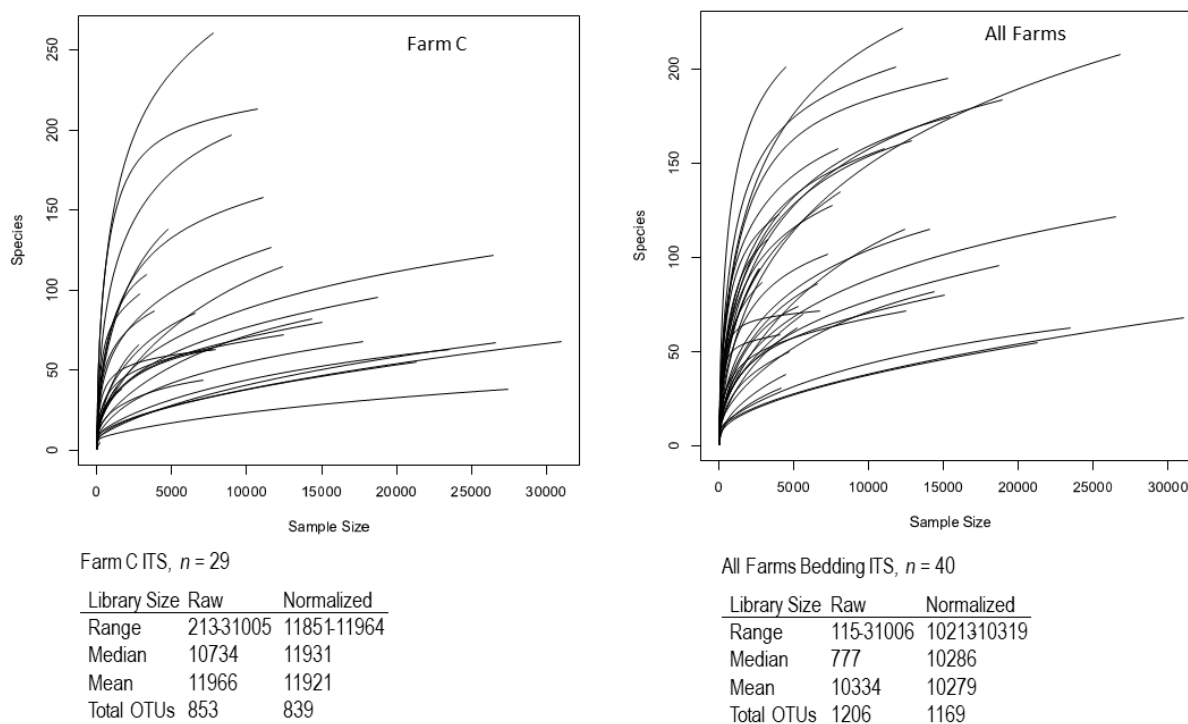

**Figure S2 Normalization curves for fungal amplicons** produced with ITS1F and ITS2 primers targeted for the fungal ITS1 region. Independent normalization curves were established for reference Farm C (left) and for all farms combined (right). Each sample was randomly subset stepwise without replacement to represent the relationship between sequencing depth and OTU richness.

**Table S1 Farm Management Practice** Five certified organic dairies in northern Vermont USA that use bedded pack. All data is farmer reported except barn area dimension for the period October 2015 to May 2016.

|                                                          | Farm Name                                                        |                                                                  |                                                                                             |                                                   |                                                                |
|----------------------------------------------------------|------------------------------------------------------------------|------------------------------------------------------------------|---------------------------------------------------------------------------------------------|---------------------------------------------------|----------------------------------------------------------------|
|                                                          | C                                                                | B                                                                | D                                                                                           | L                                                 | S                                                              |
| <b>Barn Type</b>                                         | Fabric hoop                                                      | Fabric hoop                                                      | Fabric hoop                                                                                 | Fabric hoop                                       | Fabric hoop                                                    |
| <b>Barn area (1000 ft<sup>2</sup>)</b>                   | 13.2                                                             | 4                                                                | 4.7                                                                                         | 6                                                 | 7.76                                                           |
| <b>Barn area (m<sup>2</sup>)</b>                         | 1226.3                                                           | 371.6                                                            | 436.6                                                                                       | 557.4                                             | 720.9                                                          |
| <b>Lactating cows</b>                                    | 75                                                               | 50                                                               | 33                                                                                          | 60                                                | 0                                                              |
| <b>Non-lactating cows</b>                                | 75                                                               | 0                                                                | 20                                                                                          | 0                                                 | 60                                                             |
| <b>Ration components</b>                                 | all grass (mix of dry and fermented hay baleage)                 | 9 lb grain/day, "dryish wet bales"                               | dry hay                                                                                     | 10-12 lb grain/day, fermented hay baleage         | 8-9 lb grain /day, fermented hay baleage                       |
| <b>Milk production (lbs/day/cow)</b>                     | 45                                                               | 38                                                               | 25                                                                                          | 45                                                | 34                                                             |
| <b>Bedding temperature: measurement &amp; management</b> | temperature probe, used occasionally                             | no                                                               | no                                                                                          | aeration with chisel plow to increase temperature | no                                                             |
| <b>Bedding moisture: measurement &amp; management</b>    | add wood chips if too squishy                                    | no                                                               | yes                                                                                         | add more bedding when it appears 'dirty wet'      | add more bedding when it appears wet                           |
| <b>Bedding quantity used: unit per time</b>              | 25 square bales & 17 yd <sup>3</sup> wood chips every other week | straw/hay 2x/day & wood chips added 1x/week                      | 2 round bales/day starting Nov 10, 1 bale/day starting Dec 1, 1 bale/3 days starting Dec 21 | As needed                                         | As needed                                                      |
| <b>Bedding quantity used per season</b>                  | 400 round bales, 340 yd <sup>3</sup> wood chips                  | 200 bales (500 lbs each) of straw, 72 yd <sup>3</sup> wood chips | Not reported                                                                                | 20 round bales, 1075 yd <sup>3</sup> sawdust      | 162 bales straw (500 lbs each), 500 bales sawdust (40 lb each) |

|                                                                       |                              |                              |                              |                                |                                |
|-----------------------------------------------------------------------|------------------------------|------------------------------|------------------------------|--------------------------------|--------------------------------|
| <b>Total lbs (kg) bedding used (x 1000) per winter housing period</b> | 291.8 (132.4)                | 125.2 (56.8)                 | 52.2 (23.7)                  | 300.3 (136.2)                  | 101 (45.8)                     |
| <b>Months spent on pack per year</b>                                  | 6-7                          | 7                            | 6                            | 6                              | 5                              |
| <b>Time spent on pack</b>                                             | all day except 4 hrs milking | all day except 3 hrs milking | all day except 4 hrs milking | all day except to milk and eat | all day except to milk and eat |
| <b>Fed on pack?</b>                                                   | yes                          | yes                          | yes                          | no, outside on concrete        | no, outside on concrete        |
| <b>Mean bulk tank somatic cell count/ml</b>                           | 180-200                      | 20                           | 125                          | 190                            | 150                            |

**Table S2 Most abundant bacterial genera** Median relative abundance (of total reads per sample) across six concurrent sample times between November 2016 and May 2017. Colors represent relative abundance within farm (most abundant: red; intermediate abundance: white, low abundance: blue). Blank cells represent unknown or uncertain taxonomy.

| Phylum         | Class                    | Order (-ales)   | Family (-aceae)   | Genus                   | Farm C | Farm B | Farm D | Farm L | Farm S |
|----------------|--------------------------|-----------------|-------------------|-------------------------|--------|--------|--------|--------|--------|
| Proteobacteria | $\gamma$ -Proteobacteria | Pseudomod-      | Moraxell-         | <i>Acinetobacter</i>    | 8.14   | 8.49   | 13.19  | 5.19   | 3.06   |
| Proteobacteria | $\gamma$ -Proteobacteria | Pseudomod-      | Pseudomod-        | <i>Pseudomonas</i>      | 5.70   | 6.81   | 7.71   | 2.77   | 8.48   |
| Firmicutes     | Clostridia               | MBA08           |                   |                         | 3.26   | 6.45   | 0.65   | 3.26   | 0.01   |
| Bacteroidetes  | Bacteroidia              | Bacteroid-      | Marinilabi-       | <i>Ruminofilibacter</i> | 3.23   | 2.37   | 3.39   | 4.41   | 0.00   |
| Bacteroidetes  | Sphingobacteriia         | Sphingobacteri- | Sphingobacteri-   | <i>Sphingobacterium</i> | 3.15   | 6.18   | 3.34   | 0.42   | 1.68   |
| Bacteroidetes  | Bacteroidia              | Bacteroid-      | Porphyromod-      |                         | 2.97   | 1.85   | 3.22   | 0.87   | 4.26   |
| Proteobacteria | $\gamma$ -Proteobacteria | Alteromod-      | Alteromod-        | <i>Cellvibrio</i>       | 2.62   | 0.99   | 3.19   | 0.59   | 3.03   |
| Bacteroidetes  | Flavobacteriia           | Flavobacteri-   | [Weeksell-]       |                         | 2.60   | 7.87   | 3.20   | 0.39   | 0.84   |
| Proteobacteria | $\beta$ -Proteobacteria  | Burkholderi-    | Comamod-          | <i>Comamonas</i>        | 2.30   | 2.74   | 5.33   | 0.44   | 0.35   |
| Bacteroidetes  | Flavobacteriia           | Flavobacteri-   | Flavobacteri-     | <i>Flavobacterium</i>   | 2.14   | 1.95   | 2.33   | 1.34   | 1.25   |
| Firmicutes     | Clostridia               | OPB54           |                   |                         | 2.14   | 1.52   | 0.68   | 3.01   | 0.00   |
| Proteobacteria | $\gamma$ -Proteobacteria | Alteromod-      | Alteromod-        |                         | 1.85   | 0.54   | 1.37   | 1.85   | 2.47   |
| Bacteroidetes  | Bacteroidia              | Bacteroid-      | Marinilabi-       |                         | 1.53   | 0.60   | 1.07   | 0.71   | 6.17   |
| Tenericutes    | Mollicutes               | Acholeplasmata- | Acholeplasmata-   | <i>Acholeplasma</i>     | 1.45   | 0.84   | 1.73   | 0.62   | 2.76   |
| Bacteroidetes  | Flavobacteriia           | Flavobacteri-   | [Weeksell-]       | <i>Wautersiella</i>     | 1.44   | 2.02   | 1.48   | 0.30   | 0.05   |
| Bacteroidetes  | Sphingobacteriia         | Sphingobacteri- | Sphingobacteri-   |                         | 1.35   | 2.01   | 1.68   | 0.21   | 4.13   |
| Proteobacteria | $\beta$ -Proteobacteria  | Burkholderi-    | Alcaligen-        |                         | 1.32   | 3.12   | 1.23   | 0.75   | 0.65   |
| Firmicutes     | Bacilli                  | Bacill-         | Planococc-        |                         | 1.31   | 0.77   | 1.62   | 0.09   | 0.01   |
| Proteobacteria | $\gamma$ -Proteobacteria | Xanthomod-      | Xanthomod-        | <i>Stenotrophomonas</i> | 1.24   | 1.61   | 1.56   | 0.14   | 0.31   |
| Firmicutes     | Clostridia               | Clostridi-      | Caldicoprobacter- | <i>Caldicoprobacter</i> | 1.23   | 2.15   | 0.26   | 0.64   | 0.03   |
| Firmicutes     | Clostridia               | Clostridi-      | Clostridi-        | <i>Clostridium</i>      | 1.12   | 0.82   | 0.40   | 1.57   | 0.23   |
| Proteobacteria | $\gamma$ -Proteobacteria | Pseudomod-      | Pseudomod-        |                         | 1.11   | 2.72   | 0.34   | 0.48   | 10.11  |
| Proteobacteria | $\gamma$ -Proteobacteria | Xanthomod-      | Xanthomod-        | <i>Luteimonas</i>       | 1.09   | 2.02   | 0.95   | 0.53   | 1.17   |
| Firmicutes     | Bacilli                  | Bacill-         | Planococc-        |                         | 1.07   | 0.32   | 0.13   | 0.15   | 0.00   |
| Bacteroidetes  | [Saprospirae]            | [Saprospir-]    | Chitinophag-      |                         | 1.02   | 0.88   | 0.71   | 1.78   | 0.22   |
| Bacteroidetes  | Bacteroidia              | Bacteroid-      |                   |                         | 1.00   | 0.60   | 0.45   | 0.51   | 0.16   |

|                |                  |                |                |                          |      |      |      |      |      |
|----------------|------------------|----------------|----------------|--------------------------|------|------|------|------|------|
| Proteobacteria | γ-Proteobacteria | Alteromod-     | Idiomarin-     | <i>Pseudidiomarina</i>   | 0.93 | 1.71 | 0.43 | 0.48 | 0.04 |
| Bacteroidetes  | Cytophagia       | Cytophag-      | Cytophag-      | <i>Leadbetterella</i>    | 0.89 | 0.06 | 0.23 | 0.02 | 0.00 |
| Proteobacteria | γ-Proteobacteria | Pseudomod-     | Pseudomod-     |                          | 0.87 | 0.33 | 1.30 | 0.72 | 0.11 |
| Bacteroidetes  | Flavobacteriia   | Flavobacteri-  | Flavobacteri-  |                          | 0.81 | 0.33 | 1.37 | 0.55 | 2.41 |
| Spirochaetes   | Spirochaetes     | Spirochaet-    | Spirochaet-    | <i>Treponema</i>         | 0.80 | 0.63 | 0.44 | 1.62 | 0.23 |
| Firmicutes     | Clostridia       | Clostridi-     | Ruminococc-    |                          | 0.79 | 0.64 | 0.86 | 0.75 | 0.51 |
| Tenericutes    | RF3              | ML615J-28      |                |                          | 0.67 | 0.40 | 0.13 | 1.72 | 0.06 |
| Proteobacteria | α-Proteobacteria | Caulobacter-   | Caulobacter-   | <i>Brevundimonas</i>     | 0.63 | 0.22 | 0.94 | 0.11 | 0.09 |
| Bacteroidetes  | Flavobacteriia   | Flavobacteri-  | Cryomorph-     | <i>Fluviicola</i>        | 0.62 | 0.62 | 0.90 | 0.59 | 0.20 |
| Proteobacteria | γ-Proteobacteria | Alteromod-     |                |                          | 0.61 | 0.10 | 0.09 | 0.32 | 0.20 |
| Firmicutes     | Bacilli          | Bacill-        | Planococc-     | <i>Solibacillus</i>      | 0.58 | 0.12 | 0.38 | 0.14 | 0.12 |
| Proteobacteria | α-Proteobacteria | Rhizobi-       | Rhizobi-       | <i>Agrobacterium</i>     | 0.57 | 0.18 | 0.30 | 0.06 | 0.04 |
| Proteobacteria | β-Proteobacteria | Burkholderi-   | Comamod-       | <i>Hydrogenophaga</i>    | 0.57 | 0.30 | 0.82 | 1.48 | 0.02 |
| Firmicutes     | Bacilli          | Lactobacill-   | Leuconostoc-   |                          | 0.54 | 0.11 | 1.40 | 0.00 | 0.00 |
| Firmicutes     | Clostridia       | Clostridi-     | Lachnospir-    | <i>Coproccoccus</i>      | 0.54 | 0.41 | 0.70 | 0.68 | 1.08 |
| Firmicutes     | Clostridia       | Clostridi-     |                |                          | 0.54 | 0.41 | 0.41 | 0.94 | 0.40 |
| Proteobacteria | γ-Proteobacteria | Rhizobi-       | Hyphomicrobi-  | <i>Devosia</i>           | 0.54 | 0.15 | 0.39 | 0.15 | 0.37 |
| Proteobacteria | γ-Proteobacteria | Rhodobacter-   | Rhodobacter-   |                          | 0.54 | 0.19 | 0.56 | 0.23 | 0.18 |
| Proteobacteria | γ-Proteobacteria | Oceanospirill- | Alcanivorac-   | <i>Alcanivorax</i>       | 0.52 | 0.15 | 0.15 | 0.46 | 0.16 |
| Bacteroidetes  | VC2_1_Bac22      |                |                |                          | 0.50 | 0.08 | 0.64 | 0.25 | 0.00 |
| Firmicutes     | Clostridia       | Clostridi-     | Clostridi-     | <i>Proteiniclasticum</i> | 0.50 | 0.22 | 0.17 | 0.08 | 0.07 |
| [Thermi]       | Deinococci       | Deinococc-     | Trueper-       | B-42                     | 0.49 | 0.48 | 0.11 | 0.66 | 0.91 |
| Proteobacteria | γ-Proteobacteria | Alteromod-     | Alteromod-     | BD2-13                   | 0.48 | 0.14 | 0.26 | 0.12 | 1.07 |
| Proteobacteria | γ-Proteobacteria | Xanthomod-     | Xanthomod-     |                          | 0.48 | 0.43 | 0.49 | 0.20 | 0.19 |
| Bacteroidetes  | Cytophagia       | Cytophag-      | Cytophag-      |                          | 0.46 | 0.27 | 0.58 | 2.78 | 0.01 |
| Acidobacteria  | Acidobacteria-6  | iii1-15        |                |                          | 0.44 | 0.71 | 0.00 | 0.46 | 0.00 |
| Bacteroidetes  | Bacteroidia      | Bacteroid-     | Bacteroid-     | <i>Bacteroides</i>       | 0.44 | 0.23 | 1.36 | 0.23 | 0.44 |
| Proteobacteria | α-Proteobacteria | Rhizobi-       | Phyllobacteri- |                          | 0.44 | 0.27 | 0.37 | 0.14 | 0.15 |
| Proteobacteria |                  |                |                |                          | 0.43 | 0.17 | 0.19 | 0.46 | 0.64 |
| Proteobacteria | δ-Proteobacteria | Myxococc-      |                |                          | 0.41 | 0.40 | 0.45 | 0.95 | 0.06 |
| Bacteroidetes  | Bacteroidia      | Bacteroid-     | Bacteroid-     |                          | 0.40 | 0.12 | 1.11 | 0.26 | 0.99 |

|                |                      |                |                |                        |      |      |      |      |      |
|----------------|----------------------|----------------|----------------|------------------------|------|------|------|------|------|
| Bacteroidetes  | Flavobacteriia       | Flavobacteri-  | Flavobacteri-  |                        | 0.40 | 0.03 | 0.14 | 0.23 | 0.26 |
| Bacteroidetes  | [Saprospirae]        | [Saprospir-]   | Saprospir-     |                        | 0.39 | 0.05 | 0.02 | 1.22 | 0.14 |
| Bacteroidetes  | Bacteroidia          | Bacteroid-     | Bacteroid-     | BF311                  | 0.38 | 0.04 | 0.82 | 0.04 | 0.00 |
| Proteobacteria | γ--Proteobacteria    | Alteromod-     | 211ds20        |                        | 0.38 | 0.04 | 0.28 | 0.32 | 0.52 |
| Proteobacteria | α-Proteobacteria     | Sphingomod-    | Sphingomod-    | <i>Sphingopyxis</i>    | 0.36 | 0.05 | 0.28 | 0.08 | 0.46 |
| Proteobacteria | β-Proteobacteria     | Rhodocycl-     | Rhodocycl-     |                        | 0.36 | 0.46 | 0.44 | 0.46 | 0.01 |
| Proteobacteria | γ--Proteobacteria    | Xanthomod-     | Xanthomod-     |                        | 0.36 | 0.59 | 0.77 | 0.20 | 0.01 |
| Proteobacteria | γ--Proteobacteria    |                |                |                        | 0.35 | 0.07 | 0.29 | 0.50 | 0.69 |
| Proteobacteria | ε-proteobacteria     | Campylobacter- | Campylobacter- | <i>Arcobacter</i>      | 0.33 | 0.11 | 0.62 | 0.43 | 0.55 |
| Actinobacteria | Actinobacteria       | Actinomycet-   | Corynebacteri- | <i>Corynebacterium</i> | 0.32 | 0.56 | 0.51 | 0.03 | 0.20 |
| Bacteroidetes  | Bacteroidia          | Bacteroid-     | Porphyromod-   | <i>Paludibacter</i>    | 0.32 | 0.06 | 0.37 | 0.17 | 0.23 |
| Proteobacteria | δ-Proteobacteria     | GMD14H09       |                |                        | 0.32 | 0.20 | 0.03 | 0.23 | 0.42 |
| Fibrobacteres  | Fibrobacteria        | Fibrobacter-   | Fibrobacter-   | <i>Fibrobacter</i>     | 0.29 | 0.03 | 0.73 | 0.28 | 2.36 |
| Proteobacteria | γ--Proteobacteria    | Xanthomod-     | Sinobacter-    |                        | 0.27 | 0.17 | 0.16 | 0.67 | 0.03 |
| Firmicutes     | Bacilli              | Lactobacill-   | Aerococc-      | <i>Aerococcus</i>      | 0.26 | 0.28 | 0.44 | 0.00 | 0.01 |
| Firmicutes     | Clostridia           | Halaerobi-     | Halaerobi-     |                        | 0.26 | 0.92 | 0.21 | 0.00 | 0.00 |
| Proteobacteria | γ--Proteobacteria    | Alteromod-     | Alteromod-     |                        | 0.24 | 0.14 | 0.07 | 0.17 | 1.80 |
| Firmicutes     | Bacilli              | Bacill-        | Bacill-        | <i>Bacillus</i>        | 0.23 | 1.17 | 0.17 | 0.02 | 0.06 |
| Planctomycetes | Planctomycetia       | Pirellul-      | Pirellul-      |                        | 0.23 | 0.04 | 0.26 | 0.62 | 0.23 |
| Proteobacteria | γ--Proteobacteria    | Xanthomod-     | Xanthomod-     | <i>Pseudofulvimos</i>  | 0.23 | 0.06 | 0.14 | 0.30 | 0.47 |
| Proteobacteria | γ--Proteobacteria    | Alteromod-     | [Chromati-]    |                        | 0.22 | 0.00 | 0.39 | 0.58 | 0.38 |
| Proteobacteria | β-Proteobacteria     | Methylophil-   | Methylophil-   |                        | 0.20 | 0.14 | 0.29 | 0.46 | 0.03 |
| Firmicutes     | Clostridia           | Clostridi-     | [Tissierell-]  | <i>Sedimentibacter</i> | 0.18 | 0.09 | 0.14 | 0.51 | 0.17 |
| Proteobacteria | β-Proteobacteria     | Burkholderi-   | Alcaligen-     | <i>Oligella</i>        | 0.15 | 1.59 | 0.03 | 0.00 | 0.21 |
| Proteobacteria | γ--Proteobacteria    | Xanthomod-     | Sinobacter-    | <i>Steroidobacter</i>  | 0.14 | 0.07 | 0.09 | 1.89 | 0.03 |
| Firmicutes     | Bacilli              | Bacill-        | Bacill-        |                        | 0.13 | 0.75 | 0.03 | 0.03 | 0.20 |
| Proteobacteria | β-Proteobacteria     | Burkholderi-   | Alcaligen-     | <i>Alcaligenes</i>     | 0.12 | 0.57 | 0.02 | 0.00 | 0.55 |
| Proteobacteria | γ--Proteobacteria    | Pseudomod-     | Moraxell-      | <i>Psychrobacter</i>   | 0.12 | 0.00 | 0.15 | 0.11 | 1.37 |
| Acidobacteria  | [Chloracidobacteria] | RB41           | Ellin6075      |                        | 0.10 | 0.23 | 0.03 | 1.99 | 0.00 |
| Bacteroidetes  | Flavobacteriia       | Flavobacteri-  | Cryomorph-     | <i>Brumimicrobium</i>  | 0.08 | 0.15 | 0.17 | 0.03 | 2.32 |
| Firmicutes     | Bacilli              | Bacill-        |                |                        | 0.08 | 0.94 | 0.08 | 0.24 | 0.00 |

|                |                  |               |                 |                      |      |      |      |      |      |
|----------------|------------------|---------------|-----------------|----------------------|------|------|------|------|------|
| Fibrobacteres  | TG3              | TG3-1         | TSCOR003-O20    |                      | 0.06 | 0.00 | 0.00 | 1.71 | 0.01 |
| Actinobacteria | Acidimicrobiia   | Acidimicrobi- |                 |                      | 0.04 | 0.01 | 0.03 | 0.87 | 0.02 |
| Bacteroidetes  | Flavobacteriia   | Flavobacteri- | Flavobacteri-   | <i>Gelidibacter</i>  | 0.03 | 0.00 | 0.02 | 0.08 | 0.94 |
|                |                  |               |                 | <i>Candidatus</i>    |      |      |      |      |      |
| Proteobacteria | γ-Proteobacteria | Alteromod-    | Alteromod-      | <i>Endobugula</i>    | 0.03 | 0.02 | 0.01 | 0.07 | 2.73 |
| Chloroflexi    | Aerolineae       | GCA004        |                 |                      | 0.02 | 0.00 | 0.00 | 1.89 | 0.00 |
| Proteobacteria | γ-Proteobacteria | Alteromod-    | Idiomarin-      |                      | 0.02 | 0.00 | 0.01 | 0.00 | 3.22 |
| Proteobacteria | γ-Proteobacteria | Methylococc-  | Methylococc-    | <i>Methylocaldum</i> | 0.02 | 0.00 | 0.00 | 2.80 | 0.00 |
| Chloroflexi    | Aerolineae       | CFB-26        |                 |                      | 0.01 | 0.01 | 0.00 | 2.68 | 0.00 |
| Proteobacteria | γ-Proteobacteria | Thiotrich-    | Piscirickettsi- |                      | 0.01 | 0.05 | 0.00 | 1.29 | 0.02 |
| Proteobacteria | β-Proteobacteria | Rhodocycl-    | Rhodocycl-      | <i>Thauera</i>       | 0.00 | 0.00 | 0.00 | 1.05 | 0.00 |



**Table S3 Most abundant fungal genera** Median relative abundance (of total reads per sample) across six concurrent sample times between November 2016 and May 2017. Colors represent relative abundance within farm (most abundant: red; intermediate abundance: white, low abundance: blue). Blank cells represent unknown or uncertain taxonomy.

| Phylum (-mycota) | Class (-mycetes) | Order (-ales)  | Family (-aceae) | Genus                  | Farm C | Farm B | Farm D | Farm L | Farm S |
|------------------|------------------|----------------|-----------------|------------------------|--------|--------|--------|--------|--------|
| Asco             | Saccharo-        | Saccharomycet- | Pichi-          | <i>Pichia</i>          | 36.46  | 2.59   | 31.95  | 17.41  | 3.78   |
| Asco             | Saccharo-        | Saccharomycet- | Phaffomycet-    | <i>Wickerhamomyces</i> | 9.06   | 3.59   | 7.64   | 0.92   | 7.26   |
| Asco             | Saccharo-        | Saccharomycet- | Phaffomycet-    | <i>Cyberlindnera</i>   | 3.93   | 0.10   | 0.69   | 0.07   | 0.83   |
| Asco             | Saccharo-        | Saccharomycet- | Pichi-          | <i>Nakazawaea</i>      | 3.58   | 0.00   | 0.00   | 0.00   | 0.00   |
| Asco             | Pezizo-          | Peziz-         | Ascobol-        |                        | 3.55   | 0.00   | 0.78   | 0.05   | 0.29   |
| Asco             | Saccharo-        | Saccharomycet- | Cephaloasc-     | <i>Cephaloascus</i>    | 2.32   | 0.00   | 0.09   | 0.00   | 0.00   |
| Basidio          | Tremello-        | Trichosporon-  | Trichosporon-   | <i>Trichosporon</i>    | 2.13   | 0.04   | 0.00   | 0.08   | 0.05   |
| Asco             | Saccharo-        | Saccharomycet- | Debaryomycet-   | <i>Yamadazyma</i>      | 1.83   | 0.00   | 0.08   | 0.00   | 0.00   |
| Asco             | Saccharo-        | Saccharomycet- | Phaffomycet-    | <i>Cyberlindnera</i>   | 1.65   | 0.21   | 0.00   | 0.00   | 0.00   |
| Asco             | Saccharo-        | Saccharomycet- | Debaryomycet-   | <i>Debaryomyces</i>    | 1.15   | 4.39   | 0.58   | 0.01   | 0.00   |
| Asco             | Saccharo-        | Saccharomycet- | Phaffomycet-    | <i>Barnettozyma</i>    | 1.13   | 0.03   | 0.00   | 0.19   | 0.62   |
| Asco             | Saccharo-        | Saccharomycet- | Debaryomycet-   | <i>Kurtzmaniella</i>   | 1.04   | 0.00   | 0.00   | 0.00   | 0.00   |
| Asco             | Saccharo-        | Saccharomycet- | Debaryomycet-   | CTG clade              | 0.92   | 0.48   | 0.00   | 0.00   | 0.00   |
| Basidio          | Agarico-         | Agaric-        | Agaric-         |                        | 0.61   | 0.06   | 4.28   | 1.14   | 0.16   |
| Asco             | Eurotio-         | Euroti-        | Trichocom-      | <i>Aspergillus</i>     | 0.60   | 1.26   | 5.12   | 1.15   | 0.55   |
| Asco             | Eurotio-         | Euroti-        | Trichocom-      | <i>Emericella</i>      | 0.54   | 0.17   | 0.19   | 0.00   | 0.00   |
| Asco             | Saccharo-        | Saccharomycet- | Debaryomycet-   | <i>Kurtzmaniella</i>   | 0.50   | 0.53   | 0.04   | 0.25   | 0.00   |
| Asco             | Eurotio-         | Euroti-        | Incertae sedis  | <i>Thermomyces</i>     | 0.35   | 19.46  | 0.26   | 6.66   | 0.09   |
| Asco             | Saccharo-        | Saccharomycet- | Saccharomycet-  | <i>Nakaseomyces</i>    | 0.35   | 0.00   | 0.00   | 0.00   | 0.00   |
| Asco             | Eurotio-         | Euroti-        | Trichocom-      | <i>Penicillium</i>     | 0.34   | 0.34   | 0.25   | 0.56   | 0.31   |
| Asco             | Saccharo-        | Saccharomycet- | Debaryomycet-   | <i>Debaryomyces</i>    | 0.32   | 0.00   | 0.00   | 0.00   | 0.00   |
| Asco             | Sordario-        | Sordari-       | Chaetomi-       | <i>Humicola</i>        | 0.26   | 0.06   | 0.00   | 0.16   | 0.00   |
| Zygo             | Incertae sedis   | Mortierell-    | Mortierell-     | <i>Mortierella</i>     | 0.24   | 0.36   | 0.09   | 0.34   | 0.59   |
| Basidio          | Agarico-         | Agaric-        | Pleurot-        |                        | 0.17   | 0.00   | 0.00   | 0.00   | 0.00   |
| Asco             | Eurotio-         | Ascosphaer-    | Ascosphaer-     | <i>Ascosphaera</i>     | 0.14   | 0.00   | 0.08   | 0.00   | 0.05   |

|           |                  |                  |                  |                          |      |       |       |      |       |
|-----------|------------------|------------------|------------------|--------------------------|------|-------|-------|------|-------|
| Asco      | Saccharo-        | Saccharomycet-   | Pichi-           | <i>Ogataea</i>           | 0.14 | 0.17  | 0.84  | 0.14 | 0.00  |
| Chytridio | Neocallimastigo- | Neocallimastig-  | Neocallimastig-  | <i>Cyllamyces</i>        | 0.14 | 0.10  | 0.51  | 0.00 | 0.26  |
| Basidio   | Wallemio-        | Wallemi-         | Wallemi-         | <i>Wallemia</i>          | 0.12 | 20.96 | 5.98  | 0.00 | 7.39  |
| Chytridio | Neocallimastigo- | Neocallimastig-  | Neocallimastig-  | <i>Orpinomyces</i>       | 0.12 | 0.43  | 1.44  | 0.02 | 0.00  |
| Chytridio | Neocallimastigo- | Neocallimastig-  | Neocallimastig-  | <i>Caecomycetes</i>      | 0.11 | 0.22  | 0.40  | 0.02 | 0.66  |
| Basidio   | Agarico-         | Agaric-          | Psathyrell-      | <i>Coprinopsis</i>       | 0.08 | 0.01  | 0.02  | 0.00 | 0.23  |
| Asco      | Dothideo-        | Pleospor-        | Phaeosphaeri-    | <i>Phaeosphaeria</i>     | 0.05 | 0.47  | 0.59  | 0.02 | 3.71  |
| Asco      | Sordario-        | Microasc-        | Microasc-        | <i>Scedosporium</i>      | 0.05 | 0.00  | 0.11  | 0.02 | 0.07  |
| Basidio   | Agarico-         | Agaric-          | Psathyrell-      | <i>Coprinellus</i>       | 0.05 | 0.01  | 1.68  | 0.18 | 2.66  |
| Basidio   | Tremello-        | Cystofilobasidi- | Cystofilobasidi- | <i>Mrakia</i>            | 0.05 | 1.20  | 0.42  | 1.14 | 0.02  |
| Asco      | Dothideo-        | Pleospor-        | Leptosphaeri-    | <i>Leptosphaeria</i>     | 0.04 | 0.17  | 0.01  | 0.00 | 0.10  |
| Basidio   | Tremello-        | Filobasidi-      | Filobasidi-      | <i>Cryptococcus</i>      | 0.04 | 0.25  | 0.05  | 0.04 | 0.22  |
| Asco      | Dothideo-        | Pleospor-        | Leptosphaeri-    | <i>Neosetophoma</i>      | 0.03 | 2.01  | 0.18  | 0.08 | 9.41  |
| Asco      | Dothideo-        | Pleospor-        | Phaeosphaeri-    | <i>Stagonospora</i>      | 0.03 | 0.11  | 0.22  | 0.00 | 1.02  |
| Asco      | Eurotio-         | Euroti-          |                  |                          | 0.03 | 16.46 | 11.47 | 1.68 | 0.05  |
| Asco      | Leotio-          | Heloti-          | Heloti-          | <i>Articulospora</i>     | 0.03 | 0.45  | 0.24  | 0.00 | 0.19  |
| Basidio   | Tremello-        | Cystofilobasidi- | Cystofilobasidi- | <i>Cystofilobasidium</i> | 0.03 | 3.21  | 0.02  | 2.51 | 0.07  |
| Basidio   | Tremello-        | Tremell-         | Incertae sedis   | <i>Dioszegia</i>         | 0.03 | 0.12  | 0.06  | 0.00 | 0.34  |
| Chytridio | Neocallimastigo- | Neocallimastig-  | Neocallimastig-  | <i>Anaeromyces</i>       | 0.03 | 0.02  | 0.56  | 0.01 | 0.03  |
| Chytridio | Neocallimastigo- | Neocallimastig-  | Neocallimastig-  |                          | 0.03 | 0.02  | 0.07  | 0.00 | 0.18  |
| Zygo      | Incertae sedis   | Mucor-           | Lichtheimi-      | <i>Lichtheimia</i>       | 0.03 | 0.14  | 0.00  | 0.00 | 0.00  |
| Asco      | Dothideo-        | Dothide-         | Dothior-         | <i>Aureobasidium</i>     | 0.02 | 0.20  | 0.11  | 0.00 | 1.15  |
| Asco      | Dothideo-        | Pleospor-        | Incertae sedis   |                          | 0.02 | 0.07  | 0.37  | 0.00 | 0.36  |
| Asco      | Dothideo-        | Pleospor-        | Phaeosphaeri-    |                          | 0.02 | 1.01  | 0.97  | 0.00 | 17.27 |
| Asco      | Dothideo-        | Pleospor-        | NA               | NA                       | 0.02 | 0.07  | 0.05  | 0.00 | 0.65  |
| Basidio   | Agarico-         | Agaric-          | Agaric-          | <i>Coprinus</i>          | 0.02 | 0.00  | 0.00  | 0.83 | 0.00  |
| Basidio   | Microbotryo-     | Sporidiobol-     | Incertae sedis   | <i>Sporobolomyces</i>    | 0.02 | 0.51  | 0.10  | 0.00 | 0.35  |
| Asco      | Dothideo-        | Dothide-         | Dothior-         | NA                       | 0.01 | 0.26  | 0.08  | 0.01 | 0.10  |
| Asco      | Dothideo-        | Pleospor-        | Cucurbitari-     | <i>Pyrenochaetopsis</i>  | 0.01 | 0.00  | 0.23  | 0.00 | 0.00  |
| Asco      | Dothideo-        | Pleospor-        | Montagnul-       | <i>Paraphaeosphaeria</i> | 0.01 | 0.05  | 0.15  | 0.01 | 0.03  |
| Asco      | Dothideo-        | Pleospor-        | Phaeosphaeri-    | NA                       | 0.01 | 0.24  | 0.09  | 0.00 | 0.51  |

|         |                |                |                |                         |      |      |      |      |      |
|---------|----------------|----------------|----------------|-------------------------|------|------|------|------|------|
| Asco    | Dothideo-      | Pleospor-      | Sporormi-      | <i>Preussia</i>         | 0.01 | 0.02 | 0.13 | 0.00 | 0.04 |
| Asco    | Dothideo-      | Pleospor-      |                |                         | 0.01 | 0.27 | 0.00 | 0.00 | 0.03 |
| Asco    | Leotio-        | Heloti-        | Incertae sedis | <i>Helgardia</i>        | 0.01 | 0.09 | 0.01 | 0.00 | 0.18 |
| Asco    | Leotio-        | Heloti-        | Incertae sedis | <i>Tetracladium</i>     | 0.01 | 0.00 | 0.10 | 0.00 | 0.90 |
| Asco    | Orbili-        | Orbili-        | Orbili-        |                         | 0.01 | 0.00 | 0.00 | 0.00 | 2.68 |
| Asco    | Pezizo-        | Peziz-         | Ascobol-       | <i>Ascobolus</i>        | 0.01 | 0.04 | 0.00 | 3.08 | 3.55 |
| Asco    | Dothideo-      | Incertae sedis | Incertae sedis | <i>Leptospora</i>       | 0.00 | 0.06 | 0.00 | 0.00 | 0.89 |
| Asco    | Dothideo-      | Pleospor-      | Incertae sedis | <i>Ascochyta</i>        | 0.00 | 0.66 | 0.01 | 0.00 | 1.28 |
| Asco    | Eurotio-       | Chaetothyri-   | Chaetothyri-   | <i>Cyphellophora</i>    | 0.00 | 2.39 | 0.00 | 0.00 | 0.22 |
| Asco    | Eurotio-       | Euroti-        | Thermoasc-     | <i>Thermoascus</i>      | 0.00 | 0.15 | 0.12 | 0.00 | 0.00 |
| Asco    | Eurotio-       | Euroti-        | Trichocom-     | <i>Rasamsonia</i>       | 0.00 | 0.55 | 0.00 | 0.04 | 0.00 |
| Asco    | Eurotio-       | Euroti-        | Trichocom-     | NA                      | 0.00 | 0.08 | 0.00 | 0.11 | 0.03 |
| Asco    | Eurotio-       | Onygen-        |                |                         | 0.00 | 0.00 | 0.00 | 0.00 | 0.70 |
| Asco    | Incertae sedis | Incertae sedis | Incertae sedis | <i>Hymenula</i>         | 0.00 | 0.00 | 0.25 | 0.00 | 0.00 |
| Asco    | Leotio-        | Heloti-        | Hyaloscyph-    | <i>Cistella</i>         | 0.00 | 0.02 | 0.00 | 0.00 | 0.35 |
| Asco    | Leotio-        | Heloti-        | Hyaloscyph-    | <i>Rodwayella</i>       | 0.00 | 0.02 | 0.00 | 0.00 | 0.17 |
| Asco    | Pezizo-        | Peziz-         | Peziz-         |                         | 0.00 | 0.18 | 0.00 | 0.00 | 0.00 |
| Asco    | Pezizo-        | Peziz-         | Pyronemat-     | <i>Pseudaleuria</i>     | 0.00 | 0.00 | 0.00 | 0.00 | 0.17 |
| Asco    | Pezizo-        |                |                |                         | 0.00 | 0.00 | 0.00 | 0.01 | 0.23 |
| Asco    | Saccharo-      | Saccharomycet- | Cephaloasc-    | <i>Cephaloascus</i>     | 0.00 | 0.50 | 0.00 | 0.87 | 0.01 |
| Asco    | Saccharo-      | Saccharomycet- | Debaryomycet-  | <i>Ambrosiozyma</i>     | 0.00 | 1.68 | 0.00 | 0.00 | 0.00 |
| Asco    | Saccharo-      | Saccharomycet- | Debaryomycet-  | <i>Meyerozyma</i>       | 0.00 | 0.04 | 0.00 | 0.52 | 0.00 |
| Asco    | Saccharo-      | Saccharomycet- | Debaryomycet-  | <i>Ogataea</i>          | 0.00 | 2.70 | 0.00 | 0.00 | 0.00 |
| Asco    | Saccharo-      | Saccharomycet- | Incertae sedis | <i>Candida</i>          | 0.00 | 0.00 | 2.77 | 0.00 | 0.00 |
| Asco    | Saccharo-      | Saccharomycet- | Pichi-         | <i>Nakazawaea</i>       | 0.00 | 0.20 | 0.02 | 0.04 | 0.00 |
| Basidio | Agarico-       | Agaric-        | Bolbiti-       | <i>Conocybe</i>         | 0.00 | 0.02 | 0.00 | 0.00 | 0.17 |
| Basidio | Agarico-       | Agaric-        |                |                         | 0.00 | 0.00 | 0.00 | 0.00 | 0.72 |
| Basidio | Agarico-       | Cantharell-    | Ceratobasidi-  | <i>Ceratobasidium</i>   | 0.00 | 0.01 | 0.01 | 0.01 | 0.13 |
| Basidio | Agarico-       | Cortici-       |                |                         | 0.00 | 0.03 | 0.00 | 0.00 | 0.13 |
| Basidio | Microbotryo-   | Leucosporidi-  | Leucosporidi-  | <i>Leucosporidiella</i> | 0.00 | 0.38 | 0.01 | 0.08 | 0.01 |
| Basidio | Microbotryo-   | Leucosporidi-  | Leucosporidi-  | <i>Leucosporidium</i>   | 0.00 | 0.28 | 0.00 | 0.07 | 0.03 |

|           |                  |                  |                  |                      |      |      |      |      |      |
|-----------|------------------|------------------|------------------|----------------------|------|------|------|------|------|
| Basidio   | Microbotryo-     | Sporidiobol-     | Incertae sedis   | <i>Rhodotorula</i>   | 0.00 | 0.11 | 0.02 | 0.00 | 0.21 |
| Basidio   | Microbotryo-     | Sporidiobol-     | Incertae sedis   |                      | 0.00 | 0.34 | 0.00 | 0.01 | 0.03 |
| Basidio   | Puccinio-        | Incertae sedis   | Incertae sedis   | <i>Zymoxenogloea</i> | 0.00 | 0.00 | 0.55 | 0.00 | 0.00 |
| Basidio   | Tremello-        |                  |                  |                      | 0.00 | 0.11 | 0.00 | 0.00 | 0.10 |
| Basidio   | Tremello-        | Cystofilobasidi- | Cystofilobasidi- | <i>Guehomyces</i>    | 0.00 | 0.24 | 0.05 | 0.54 | 0.04 |
| Basidio   | Tremello-        | Cystofilobasidi- | Incertae sedis   | <i>Mrakiella</i>     | 0.00 | 0.08 | 0.01 | 0.12 | 0.01 |
| Basidio   | Tremello-        | Holtermanni-     | Incertae sedis   | <i>Holtermannia</i>  | 0.00 | 0.00 | 0.00 | 0.00 | 0.17 |
| Basidio   | Tremello-        | Tremell-         | Incertae sedis   | <i>Cryptococcus</i>  | 0.00 | 0.04 | 0.14 | 0.03 | 0.68 |
| Basidio   | Tremello-        | Tremell-         | Incertae sedis   | <i>Hannaella</i>     | 0.00 | 0.00 | 0.00 | 0.00 | 0.17 |
| Chytridio | Neocallimastigo- | Neocallimastig-  | Neocallimastig-  | <i>Piromyces</i>     | 0.00 | 0.07 | 0.15 | 0.00 | 0.00 |
